# Supplementary material for: Proteomic Atlas of Post-COVID Sequelae
Source: Research Square preprint supplement (doi:10.21203/rs.3.rs-6024310/v1), 2025-03-05
Supplement: Supplementary file 1 [file 6cdd8203b0dc75bfce063acd.docx]

**Supplemental Appendix**

**Proteomic Atlas of Post-COVID Sequelae**

Sepehr Golriz Khatami1, Rieke Baumkötter1,2, Thomas Köck1, Ayesha Syed Mamoor Alam1, Simge Yilmaz1,2, Julian Chalabi1, Steffen Rapp1, Federico Marini3,4, Markus Schepers3, Tobias Bopp5, Stefan Bittner4,6, Alexander K. Schuster7, Manfred E. Beutel8, Thomas Münzel2,9, Karl Lackner10, Vincent ten Cate1,2,11, Philipp S. Wild1,2,11,12*

1. Preventive Cardiology and Preventive Medicine, Department of Cardiology, University Medical Center of the Johannes Gutenberg University Mainz, Germany
2. German Center for Cardiovascular Research (DZHK), Partner Site Rhine-Main, University Medical Center of the Johannes Gutenberg University Mainz, Mainz, Germany
3. Institute of Medical Biostatistics, Epidemiology and Informatics (IMBEI), University Medical Center, Johannes Gutenberg University, Mainz, Germany,
4. Research Center for Immunotherapy (FZI), University Medical Center, Johannes Gutenberg University, Mainz, Germany
5. Institute of Immunology, University Medical Center, Johannes Gutenberg University, Mainz, Germany
6. Department of Neurology, Focus Program Translational Neuroscience and FZI, Rhine-Main Neuroscience Network, University Medical Center, Johannes Gutenberg University, Mainz, Germany
7. Department of Ophthalmology, University Medical Center of the Johannes Gutenberg University Mainz, Mainz, Germany
8. Department of Psychosomatic Medicine, University Medical Center of the Johannes Gutenberg University Mainz, Mainz, Germany
9. Cardiology I, Center for Cardiology, University Medical Center of the Johannes Gutenberg University Mainz, Mainz, Germany
10. Institute of Clinical Chemistry and Laboratory Medicine, University Medical Center of the Johannes Gutenberg University Mainz, Mainz, Germany
11. Clinical Epidemiology and Systems Medicine, Center for Thrombosis and Hemostasis (CTH), Mainz, Germany
12. Institute of Molecular Biology (IMB), Mainz, Germany

***Corresponding Author**

Philipp S. Wild, MD MSc

Preventive Cardiology and Medical Prevention, Department of Cardiology

Clinical Epidemiology and Systems Medicine, Center for Thrombosis and Hemostasis

University Medical Center of the Johannes Gutenberg University Mainz

Langenbeckstr. 1, 55131 Mainz

Email: Philipp.wild@unimedizin-mainz.de; Telephone: +49 (0) 6131 17-7163

**Ethics declarations**

GHS, GCS, and GPC were approved by the Ethics Committee of the State Chamber of Physicians of Rhineland-Palatinate and by local and federal data safety commissioners, the local ethics committee of the “Landesärztekammer Rheinland-Pfalz” (reference no.: GCS:2018–13720), and German Federal Data Protection Law (Bundesdatenschutzgesetz – BDSG; 2017), and the General Data Protection Regulation (Regulation (EU) 2016/679), respectively. The design, conduct, and analysis of these studies adhered to the ethical principles outlined in the Declaration of Helsinki and the methodological standards of Good Epidemiological Practice.

# **High-throughput proteomic profiling**

Briefly, antibody-conjugated probes (each targeting a specific protein) are distributed across the panels. Each panel includes controls for quality assurance (interleukin-6, interleukin-8, tumor necrosis factor). Following overnight incubation for target capture, a two-step amplification process occurs. Complementary probes hybridize and extend, and the resulting DNA is amplified by PCR and indexed for sequencing on the Illumina NovaSeq platform. Stringent quality control measures are implemented. Internal controls (incubation, extension, amplification) assess intra-assay variability, while external controls (negative control, plate controls) determine the detection limit and adjust for inter-plate variations. Additionally, two known samples serve as controls to evaluate measurement precision.

**Polygenic risk scores**

Initially, Single Nucleotide Polymorphisms (SNPs) and their corresponding coefficient estimates, associated with each risk factor, were procured from the GWAS catalog of the National Human Genome Research Institute-European Bioinformatics Institute (NHGRI-EBI) [1]. Subsequently, these risk factor SNPs were selectively extracted from the GCS individuals whose genetic information is available as a part of data in the GHS cohort. Variants exhibiting low imputation quality (r2 < 0.8), missing effect size or risk allele in the GWAS catalog summary statistics, or devoid of variance in the data were systematically excluded. When multiple coefficient estimates were reported for the same SNP–trait pair, a meta-analysis was conducted before adopting the pooled estimate of these effect sizes. Variants demonstrating extreme effect sizes (i.e., OR > 5 or <0.2) were discarded. The score was then computed using the remaining variants.

| **Symptom** | **Not reported** | **Reported** |
| --- | --- | --- |
| Fatigue/tiredness | 437 | 58 |
| Malaise | 489 | 6 |
| Fever | 494 | 1 |
| Chills | 492 | 3 |
| Cough (dry cough) | 479 | 16 |
| Sore throat or scratching | 488 | 7 |
| Hoarseness | 490 | 5 |
| Runny nose | 489 | 6 |
| Headache | 478 | 17 |
| Breathlessness or shortness of breath | 455 | 40 |
| Pain when breathing | 491 | 4 |
| Whistling or gasping breathing | 493 | 2 |
| Chest pain | 483 | 12 |
| Palpitations | 481 | 14 |
| Olfactory disturbances | 449 | 46 |
| Taste disturbances | 458 | 37 |
| Visual disturbances | 486 | 9 |
| Conjunctivitis | 493 | 2 |
| Hearing problems | 487 | 8 |
| Tinnitus | 488 | 7 |
| Memory problems | 464 | 31 |
| Confusion/consciousness disorders | 491 | 4 |
| Concentration problems | 455 | 40 |
| Sleep disturbances | 477 | 18 |
| Less Sleep | 479 | 16 |
| More Sleep | 486 | 9 |
| Dizziness | 480 | 15 |
| Fainting spells | 494 | 1 |
| Joint pain or swelling | 475 | 20 |
| Swollen knees | 490 | 5 |
| Muscle pain | 477 | 18 |
| Muscle stiffness | 492 | 3 |
| Limb pain | 487 | 4 |
| Twitching limbs | 491 | 4 |
| Weakness of limbs | 486 | 9 |
| Tremor | 492 | 3 |
| Numbness or tingling | 489 | 6 |
| Mood swings | 467 | 28 |
| Depression | 484 | 11 |
| Loss of interest or pleasure | 472 | 23 |
| Anxiety | 482 | 13 |
| Abdominal pain | 492 | 3 |
| Diarrhea | 492 | 3 |
| Constipation | 488 | 7 |
| Nausea/vomiting | 491 | 4 |
| Loss of appetite | 492 | 3 |
| Weight loss | 486 | 9 |
| Skin symptoms | 488 | 7 |
| Hair loss | 478 | 17 |
| Seizures | 491 | 4 |
| Urination problems | 493 | 2 |
| Problems with swallowing | 495 | 0 |
| Problems with balance | 487 | 11 |
| Problems with walking or steps | 488 | 7 |
| Slow movements | 485 | 10 |
| Painful bleeding | 490 | 5 |
| Erectile Dysfunction | 493 | 2 |
| Behavioral Changes | 488 | 7 |
| Hallucinations | 495 | 0 |
| Red-purple discoloration on toes | 495 | 0 |
| Lateral Body/Facial Laughing | 495 | 0 |

**Table S1**. **Full list of 61 distinct symptoms**.

**References:**

Sollis, Elliot, et al. "The NHGRI-EBI GWAS Catalog: knowledgebase and deposition resource." Nucleic acids research 51.D1 (2023): D977-D985.
